# Supplementary material for: Significant Therapeutic Effects of Adult Human Neural Stem Cells for Spinal Cord Injury Are Mediated by Monocyte Chemoattractant Protein-1 (MCP-1)
Source: MDPI journal article supplement (doi:10.3390/ijms23084267), 2022-04-12
Supplement: s1 [file s1]

# Significant Therapeutic Effects of Adult Human Neural Stem Cells for Spinal Cord Injury Are Mediated by Monocyte Chemoattractant Protein-1 (MCP-1)

Table S1. BBB score <sup>1</sup>.

| Group   | No. of Animal | 1WK        | 2WK           | 3WK           | 4WK           | 5WK           | 6WK           |
|---------|---------------|------------|---------------|---------------|---------------|---------------|---------------|
| Vehicle | 8             | 5.4 ± 0.52 | 8.8 ± 0.71    | 8.9 ± 0.83    | 9.3 ± 0.87    | 9.5 ± 1.41    | 9.3 ± 0.89    |
| Low     | 10            | 5.2 ± 0.67 | 9.3 ± 1.16    | 9.4 ± 0.84    | 10 ± 0.94     | 10.4 ± 1.07   | 10.7 ± 0.82 * |
| Middle  | 10            | 5.3 ± 0.54 | 10.3 ± 0.82 * | 10.7 ± 1.06 * | 11.5 ± 0.85 * | 11.8 ± 0.79 * | 11.8 ± 0.63 * |
| High    | 10            | 5.3 ± 0.63 | 9.8 ± 0.79 *  | 10.4 ± 0.97 * | 10.9 ± 1.20 * | 11 ± 1.25 *   | 11.2 ± 1.48 * |

<sup>1</sup> Average ± Standard Error (SEM), \*  $p < 0.05$  vs. Vehicle.

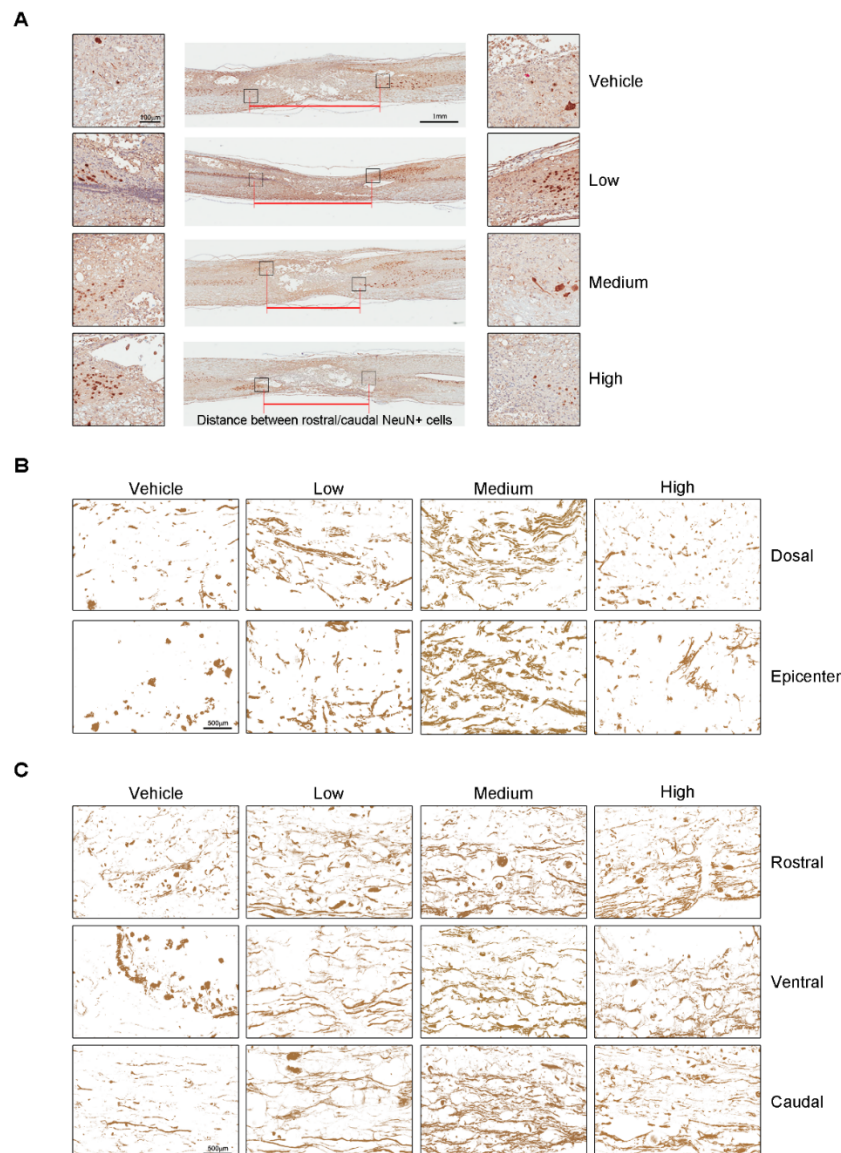

**Figure S1.** Immunohistochemistry against NeuN and Tuj1. (A) NeuN-positive neurons adjacent to damaged lesions both rostrally and caudally were identified. The distance between those neurons were measured (red lines). (B) Tuj1 immunoreactivity was evaluated in the areas of damaged spinal cord: Dorsal and Epicenter. (C) Tuj1 immunoreactivity was evaluated in the areas of damaged spinal cord: Rostral, Ventral, and Caudal.
